# Supplementary material for: Genome-Wide Association Mapping of Major Root Length QTLs Under PEG Induced Water Stress in Wheat
Source: PubMed Central journal article supplement (PMC6281995; doi:10.3389/fpls.2018.01759), 2018-11-29
Supplement: Data_Sheet_1.pdf [file Data_Sheet_1.pdf]

**Genome-wide association mapping of major root length QTLs under PEG induced water stress in wheat.**

Habtamu Ayalew<sup>1,2</sup>, Hui Liu<sup>1</sup>, Andreas Börner<sup>3</sup>, Borislav Kobiljski<sup>4</sup>, Chunji Liu<sup>5</sup>, Guijun Yan<sup>1\*</sup>

<sup>1</sup>School of Agriculture and Environment, Faculty of Science and The UWA Institute of Agriculture, The University of Western Australia, Crawley, WA, Australia. <sup>2</sup>Noble Research Institute LLC, Ardmore, OK, USA. <sup>3</sup>Genebank Department, Leibniz Institute of Plant Genetics and Crop Plant Research (IPK), Gatersleben, Germany. <sup>4</sup>Institute of Field and Vegetable Crops, Novi Sad, Serbia. <sup>5</sup>CSIRO Agriculture Flagship, QLD, Australia

\*Correspondence:

Prof Guijun Yan: [guijun.yan@uwa.edu.au](mailto:guijun.yan@uwa.edu.au)

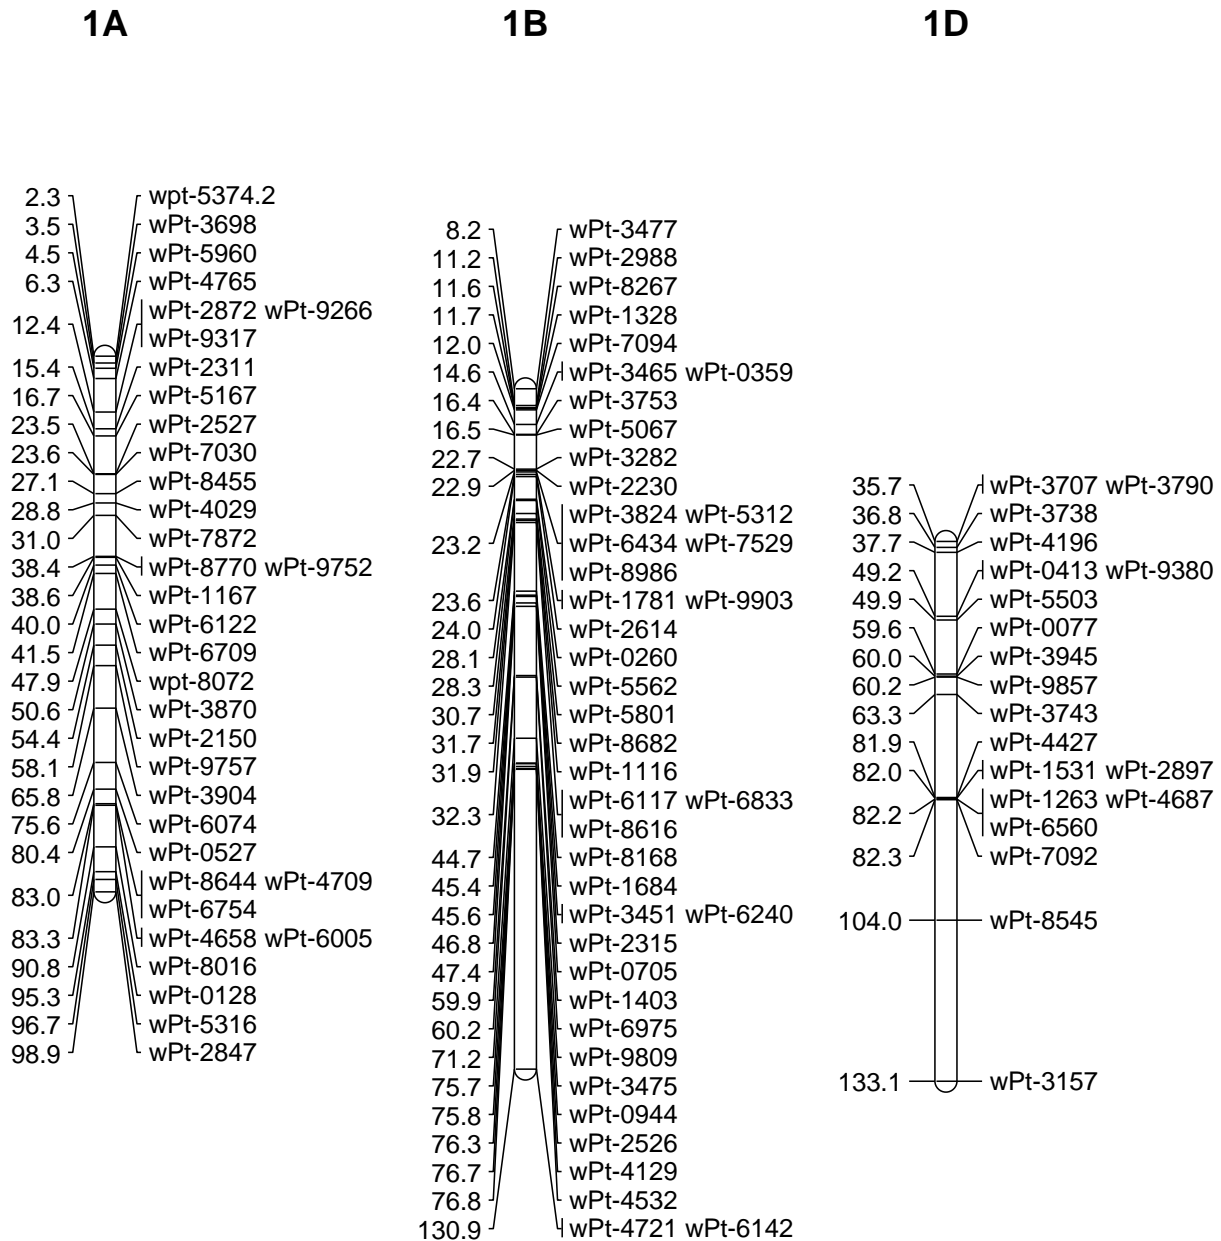

2A

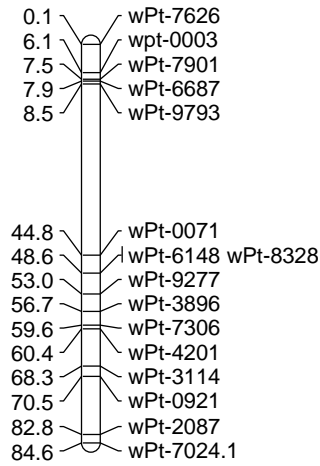

2B

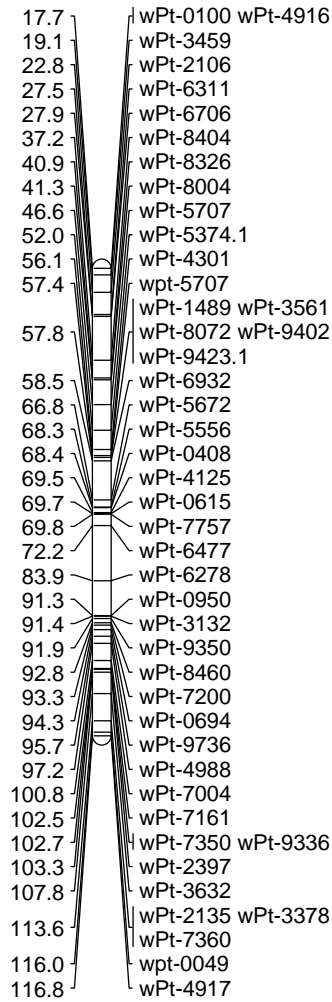

2D

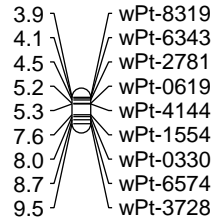

3A

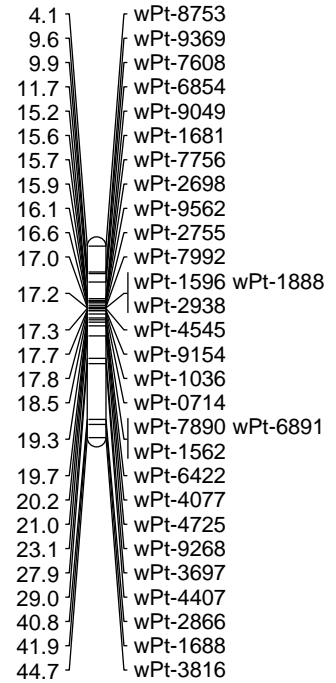

3B

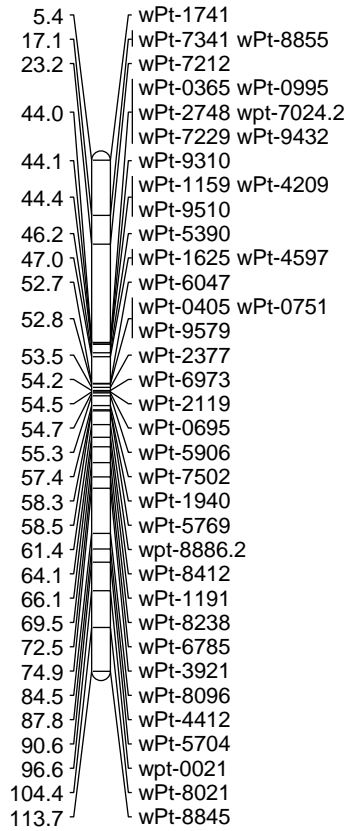

3D

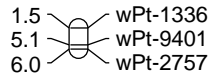

4A

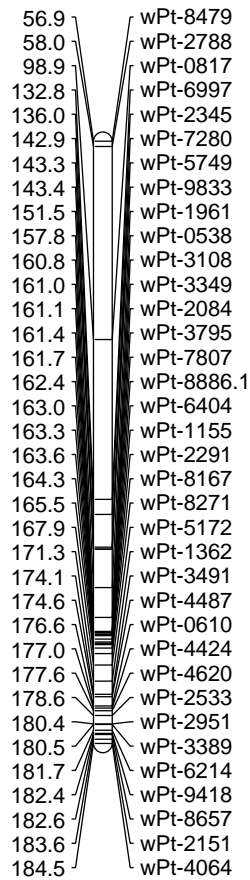

4B

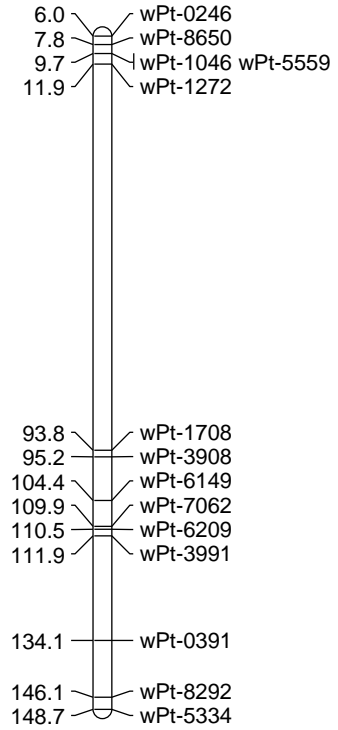

4D

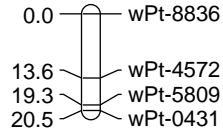

5A

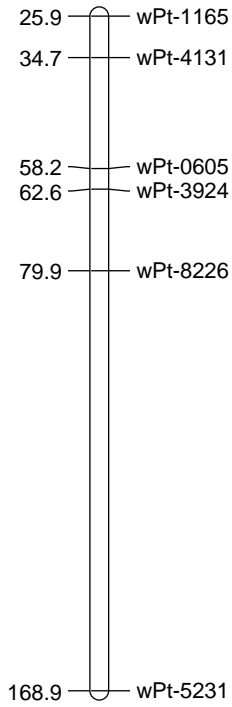

5B

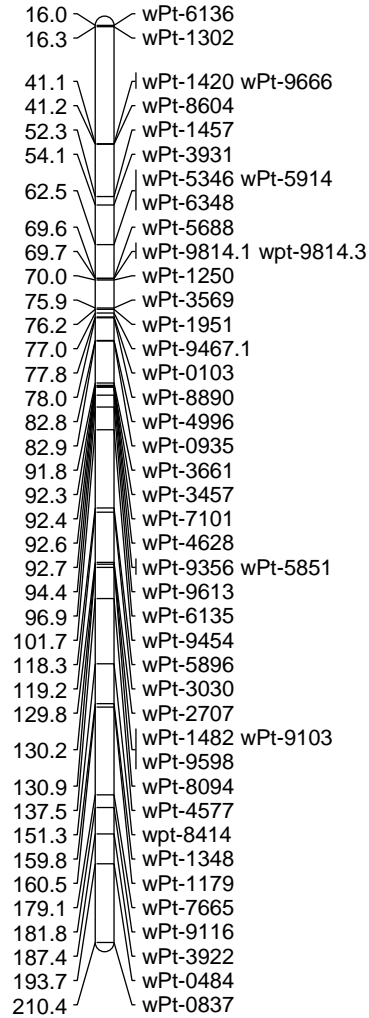

5D

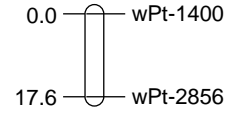

6A

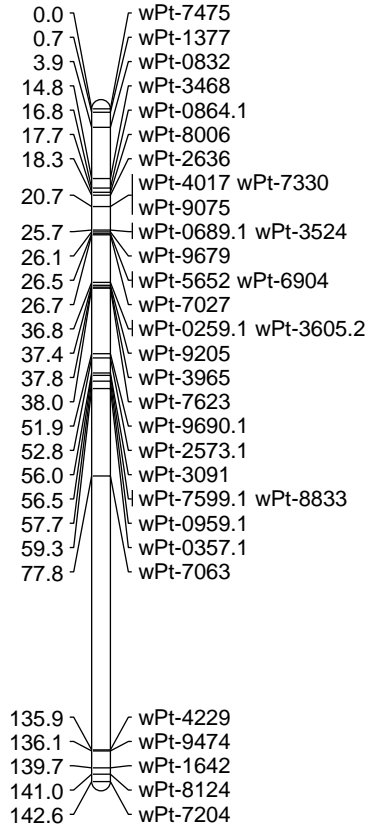

6B

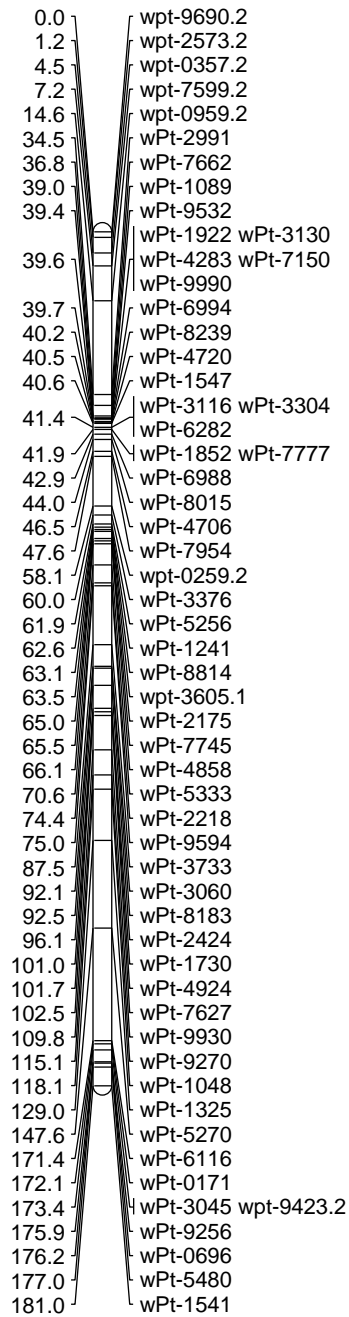

6D

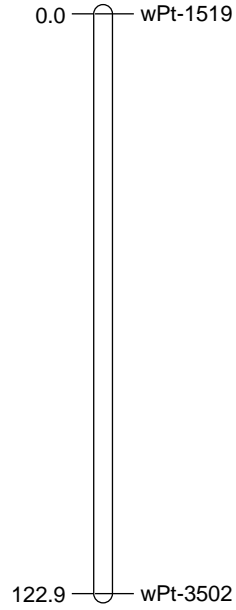

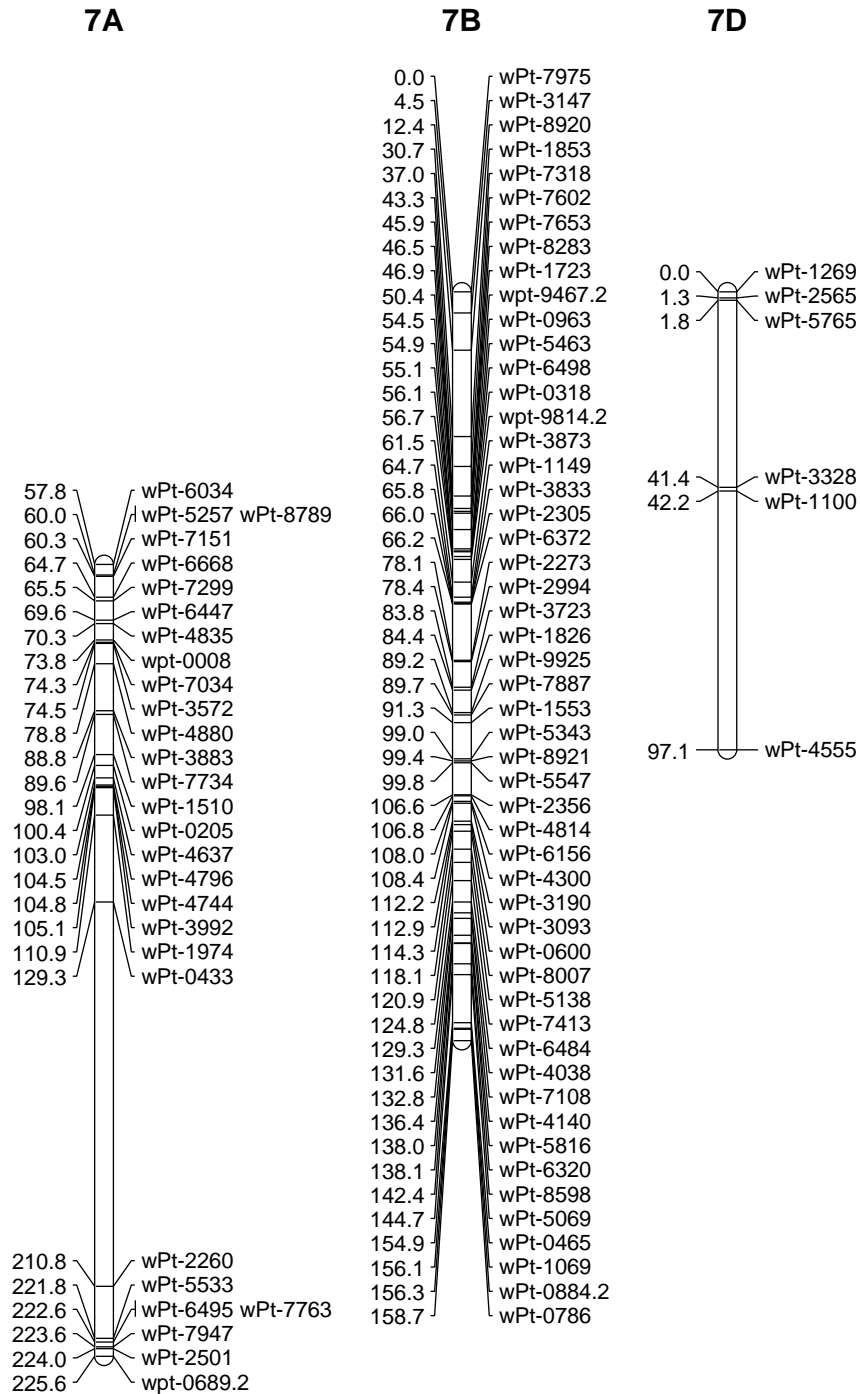

Supplementary Figure 1. Linkage map of 533 DArT markers based on CIMMYT integrated map (<https://wheat.pw.usda.gov/cgi-bin/graingenes/report.cgi?class=mapdata:name=Wheat%2C%20CIMMYT%20Integrated:show=map>)
